# Supplementary material for: The clinical significance of an AI-based assumption model for neurocognitive diseases using a novel dual-task system
Source: Research Square preprint supplement (doi:10.21203/rs.3.rs-5589749/v1), 2025-04-04
Supplement: Supplementary file 1 [file 7996b4b4134562dab86426dd.docx]

**Supplementary Table 1. The scores of the neuropsychological tests**

|  |  | ADD (n=42) | | DLB (n=11) | | MCI (n=44) | | NCD (n=97) | |
| --- | --- | --- | --- | --- | --- | --- | --- | --- | --- |
|  |  | n | mean (SD) | n | mean (SD) | n | mean (SD) | n | mean (SD) |
| MMSE-J | | 42 | 19.0 (3.0) | 11 | 21.0 (4.6) | 44 | 26.3 (2.5) | 97 | 22.6 (4.6) |
| FAB | | 41 | 11.6 (2.6) | 11 | 11.3 (3.3) | 44 | 14.1 (2.7) | 96 | 12.7 (3.0) |
| ACE-III | | 40 | 59.3 (10.0) | 11 | 57.1 (10.1) | 44 | 83.0 (6.9) | 95 | 70.0 (14.9) |
|  | attention | 40 | 10.9 (2.8) | 11 | 11.1 (3.4) | 44 | 16.8 (1.6) | 95 | 13.6 (3.8) |
|  | memory | 40 | 6.7 (2.9) | 11 | 9.5 (3.1) | 44 | 16.7 (4.8) | 95 | 11.6 (6.2) |
|  | fluency | 40 | 7.0 (2.7) | 11 | 6.7 (2.8) | 44 | 9.6 (2.0) | 95 | 8.1 (2.7) |
|  | language | 40 | 21.7 (4.5) | 11 | 20.1 (3.6) | 44 | 24.9 (1.7) | 95 | 23.0 (3.8) |
|  | visuospatial | 40 | 13.2 (2.8) | 11 | 9.7 (3.9) | 44 | 15.1 (1.5) | 95 | 13.7 (2.9) |
| WMS-R | |  |  |  |  |  |  |  |  |
|  | LM I | 41 | 2.9 (2.7) | 11 | 3.5 (3.7) | 44 | 10.2 (6.0) | 96 | 6.3 (5.8) |
|  | LM II | 41 | 0.5 (1.0) | 11 | 0.6 (1.1) | 44 | 4.3 (5.6) | 96 | 2.2 (4.3) |
| WAIS-IV | |  |  |  |  |  |  |  |  |
|  | digit span | 41 | 17.4 (4.9) | 11 | 16.5 (3.4) | 44 | 22.4 (4.2) | 96 | 19.6 (5.1) |

Abbreviations: ADD, Alzheimer’s disease dementia; DLB, dementia with Lewy bodies; MCI, mild cognitive impairment; NCD, neurocognitive disorders; MMSE-J, Mini-Mental State Examination, Japanese version; FAB, Frontal Assessment Battery; ACE-III, Addenbrook’s Cognitive Examination, third edition; WMS-R, the Wechsler Memory Scale-Revised; LM, the Logical Memory; WAIS-IV, Wechsler Adult Intelligence Test – fourth edition.
